# Supplementary material
Source: Springer Nature journal article supplement (https://www.springermedizin.de/resource/supplementary/13058_2012_3202_MOESM5_ESM.pdf/9703502)

43 y/o pre-menopause

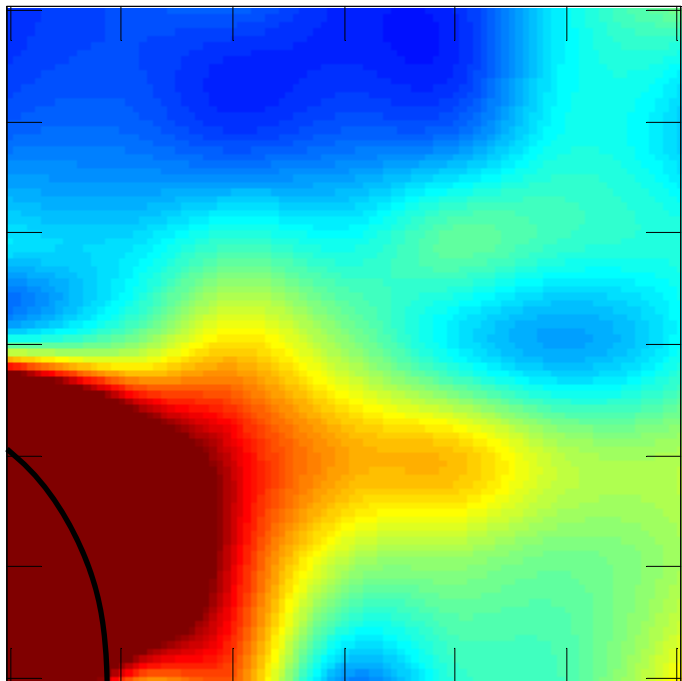

56 y/o post-menopause

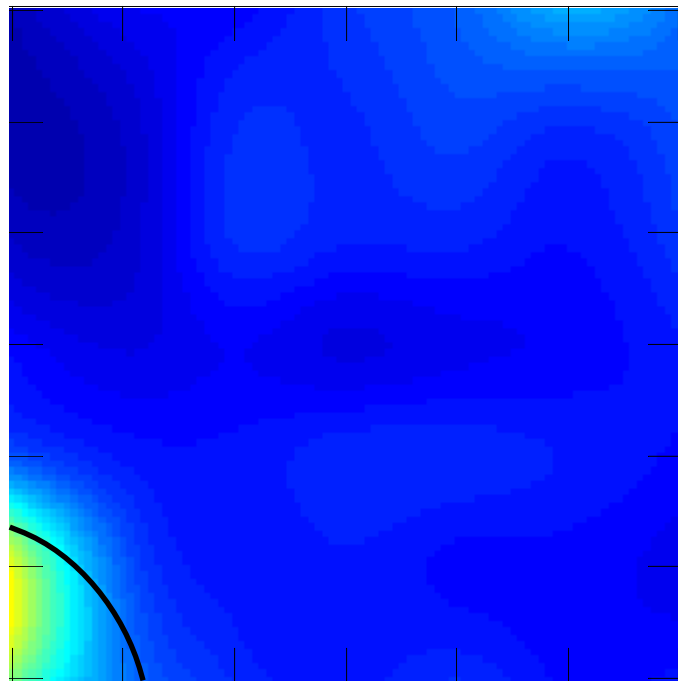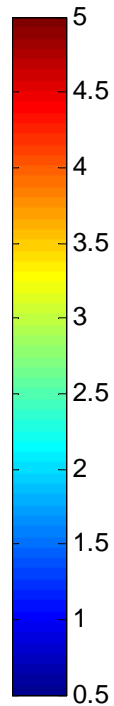

TOI =  $\text{ctHHb} \times \text{water} / (\% \text{ lipid})$

Supplement: MOESM5 [file 9703502]
